# Supplementary material
Source: PubMed Central journal article supplement (PMC5647161)
Supplement: NIHMS6949-supplement-supplement_1.pdf [file NIHMS6949-supplement-supplement_1.pdf]

## Supplemental Information

**Supplementary Table 1.** Urinary and adipose tissue catecholamines in *Tph1*<sup>+/+</sup> and *Tph1*<sup>-/-</sup> mice fed a high-fat diet for 8 weeks.

| Analyte        | <i>Tph1</i> <sup>+/+</sup> |              |              | <i>Tph1</i> <sup>-/-</sup> |              |              |
|----------------|----------------------------|--------------|--------------|----------------------------|--------------|--------------|
|                | Urine (ng/ml)              | eWAT (pg/mg) | iBAT (pg/mg) | Urine (ng/ml)              | eWAT (pg/mg) | iBAT (pg/mg) |
| Epinephrine    | 29.7 ± 3.95                | 113±8.6      | 170±9.8      | 16.4 ± 3.37*               | 106±4.7      | 286±78       |
| Norepinephrine | 174 ± 4.8                  | 8.7±2.0      | 18.6±1.0     | 170 ± 3.3                  | 8.5±2.0      | 18.6±0.9     |
| Dopamine       | 306 ± 7.8                  | 1.5±0.5      | 12.1±0.7     | 270 ± 4.2*                 | 1.4±0.4      | 15.4±2.8     |

Data are expressed as means ± s.e.m.  $n = 6$ . \* $P < 0.05$  versus *Tph1*<sup>+/+</sup> as determined using a Student's  $t$ -test. A Welch's  $t$ -test was used for the iBAT epinephrine analyses.

**Supplementary Table 2.** Tissue weights of HFD-fed C57Bl6 mice treated with vehicle or LP533401 for 10 weeks.

| Tissue                  | Vehicle    | LP533401    | $P$ -value |
|-------------------------|------------|-------------|------------|
| Heart                   | 172 ± 4.03 | 153 ± 10.6  | 0.06       |
| Spleen                  | 116 ± 5.56 | 147 ± 23.3  | 0.45       |
| Retroperitoneal Fat Pad | 442 ± 30.5 | 265 ± 29.9* | 0.002      |
| Inguinal Fat Pad        | 183 ± 21.5 | 117 ± 16*   | 0.04       |
| Epididymal Fat Pad      | 2075 ± 160 | 1157 ± 121* | 0.001      |

Tissue weights are in milligrams. Data are expressed as means ± s.e.m.  $n = 9$  vehicle and  $n = 8$  LP533401 treated.  $P$ -value was determined using a Student's  $t$ -test, except for heart and spleen weight, which required a Welch's  $t$ -test.

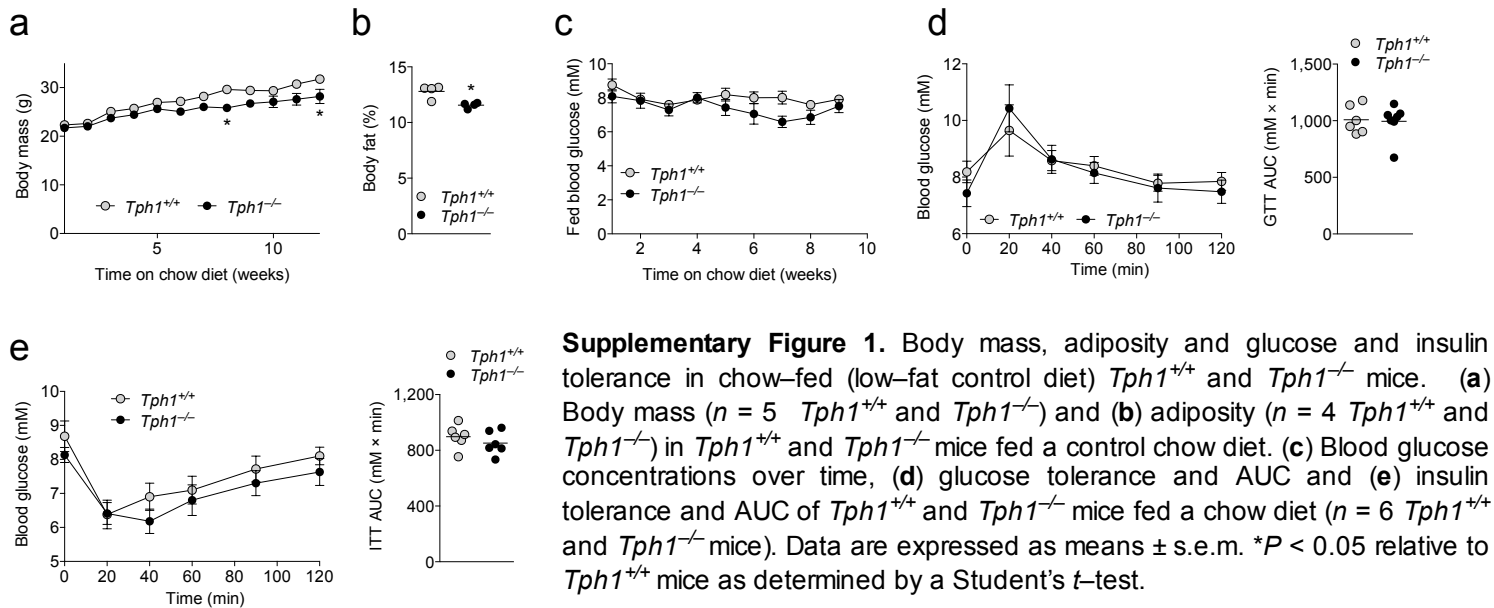

**Supplementary Figure 1.** Body mass, adiposity and glucose and insulin tolerance in chow-fed (low-fat control diet) *Tph1*<sup>+/+</sup> and *Tph1*<sup>-/-</sup> mice. **(a)** Body mass ( $n = 5$  *Tph1*<sup>+/+</sup> and *Tph1*<sup>-/-</sup>) and **(b)** adiposity ( $n = 4$  *Tph1*<sup>+/+</sup> and *Tph1*<sup>-/-</sup>) in *Tph1*<sup>+/+</sup> and *Tph1*<sup>-/-</sup> mice fed a control chow diet. **(c)** Blood glucose concentrations over time, **(d)** glucose tolerance and AUC and **(e)** insulin tolerance and AUC of *Tph1*<sup>+/+</sup> and *Tph1*<sup>-/-</sup> mice fed a chow diet ( $n = 6$  *Tph1*<sup>+/+</sup> and *Tph1*<sup>-/-</sup> mice). Data are expressed as means  $\pm$  s.e.m. \* $P < 0.05$  relative to *Tph1*<sup>+/+</sup> mice as determined by a Student's  $t$ -test.

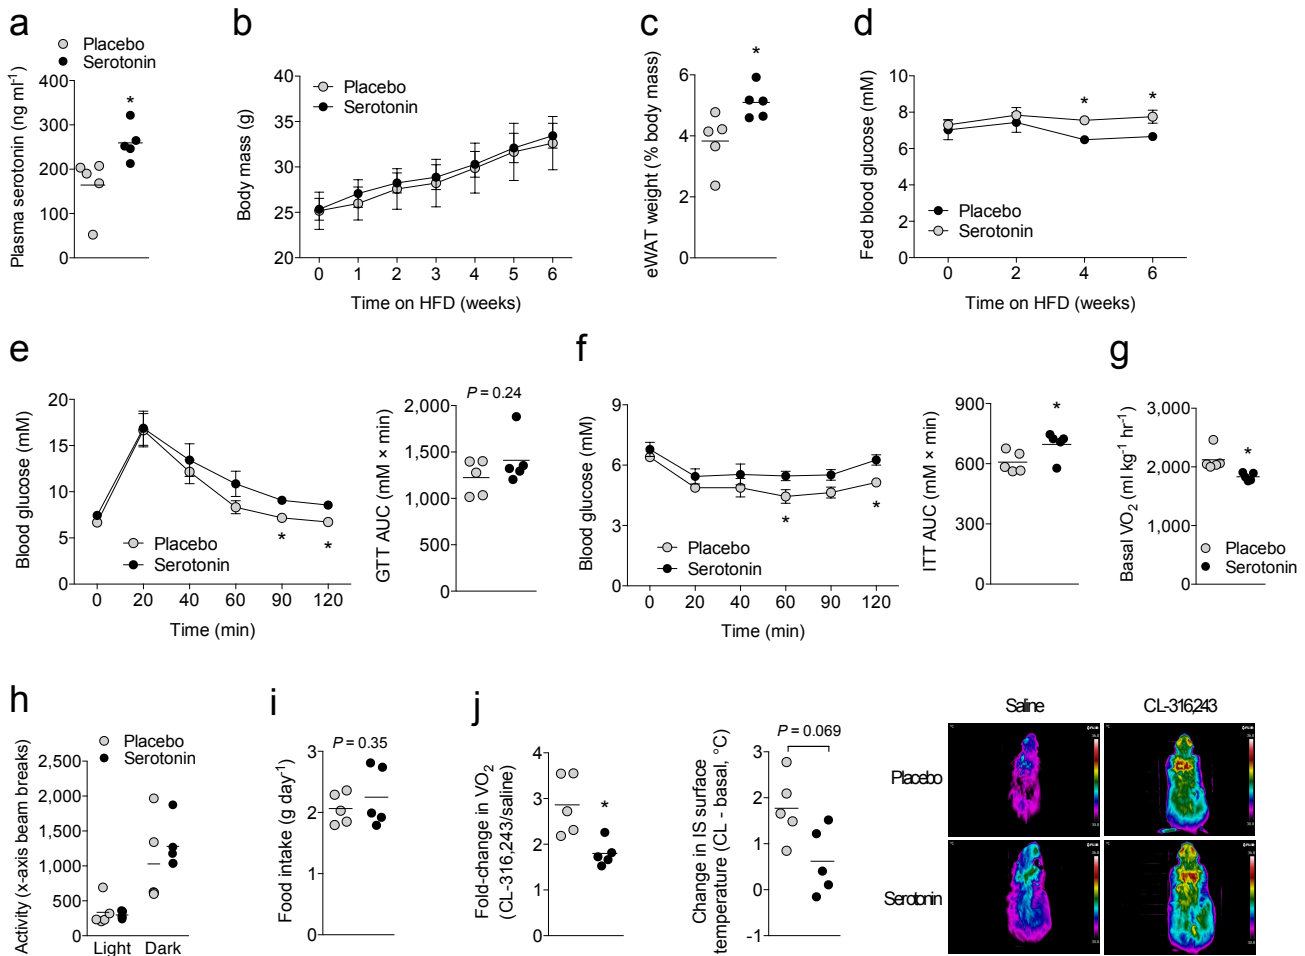

**Supplementary Figure 2.** Replacement of serotonin in *Tph1*<sup>-/-</sup> mice increases adiposity, reduces glucose tolerance and insulin sensitivity and suppresses basal metabolic rate and UCP1 mediated thermogenesis. **(a)** Plasma serotonin in HFD-fed *Tph1*<sup>-/-</sup> mice implanted with subcutaneous 60-day slow release placebo or serotonin (0.5 mg) producing pellet ( $n = 5$ ). **(b)** Body mass, **(c)** eWAT mass, **(d)** fed blood glucose over time, **(e)** glucose tolerance and **(f)** insulin sensitivity in HFD-fed *Tph1*<sup>-/-</sup> mice implanted with a subcutaneous placebo or serotonin pellet ( $n = 5$ ). **(g)** Basal oxygen consumption, **(h)** cage activity and **(i)** food intake in HFD-fed *Tph1*<sup>-/-</sup> mice implanted with subcutaneous placebo or serotonin producing pellet ( $n = 5$ ). **(j)** Change in oxygen uptake (left) and dorsal interscapular surface temperature (right) of HFD-fed *Tph1*<sup>-/-</sup> mice implanted with subcutaneous placebo or serotonin pellets following acute injection with saline or the  $\beta$ 3-adrenergic activator CL-316,243 ( $n = 5$ , representative thermal images at far right). Data are expressed as means  $\pm$  s.e.m. \* $P < 0.05$  relative to placebo pellet mice as determined by a Student's *t*-test.

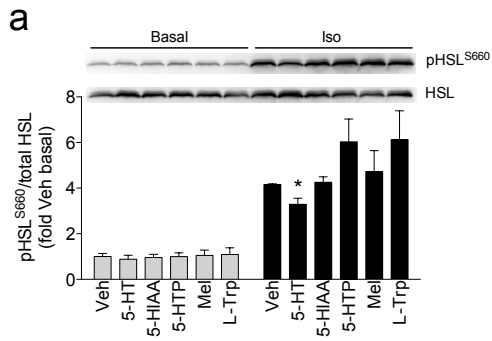

**Supplementary Figure 3.** Serotonin precursors and end products do not inhibit PKA signaling in BAT cells. **(a)** HSL phosphorylation (S660) in differentiated brown adipocytes treated with and without isoproterenol following treatment with serotonin related metabolites ( $n = 3$  experiments). Data are expressed as means  $\pm$  s.e.m. \* $P < 0.05$  versus corresponding vehicle condition as determined using a Student's  $t$ -test. 5-HT, 5-hydroxytryptamine; 5-HIAA, 5-hydroxyindoleacetic acid; 5-HTP, 5-hydroxytryptophan; Mel, melatonin; L-try, L-tryptophan.

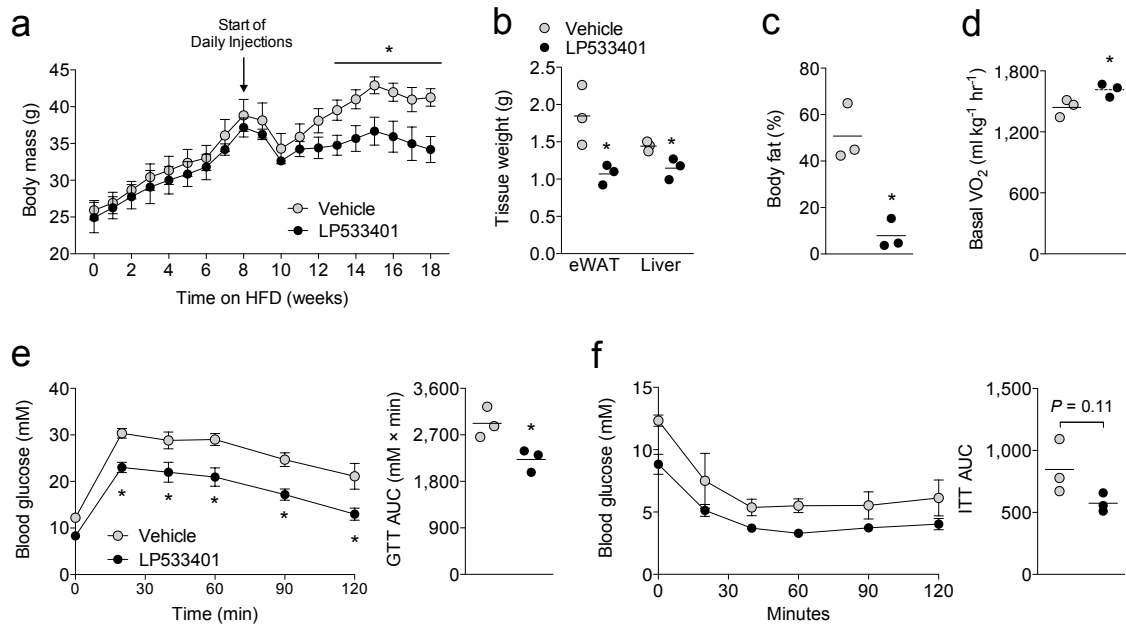

**Supplementary Figure 4.** Reversal of obesity and dysglycemia with chemical inhibition of Tph1. **(a)** Body mass over time, **(b)** eWAT pad and liver weights, **(c)** % body fat, and **(d)** basal oxygen consumption (during an absence of cage movement) in C57Bl6 mice fed a HFD for 8 wks before being treated with vehicle or LP533401 for 10 wks ( $n = 3$  Vehicle and LP533401 treated). **(e)** Glucose tolerance and **(f)** insulin sensitivity of C57Bl6 mice fed a HFD for 8 weeks before being treated with vehicle or LP533401 for 10 weeks ( $n = 3$  Vehicle and LP533401 treated). Data are expressed as means  $\pm$  s.e.m. \* $P < 0.05$  versus vehicle as determined using a Student's  $t$ -test.

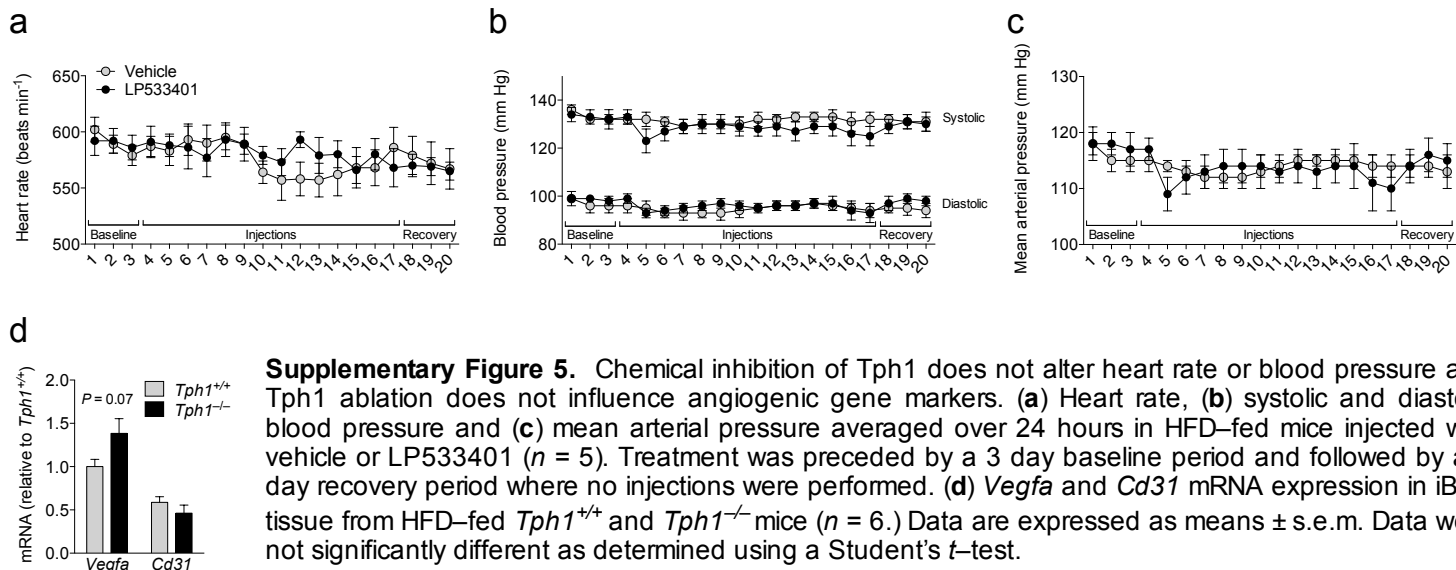

**Supplementary Figure 5.** Chemical inhibition of Tph1 does not alter heart rate or blood pressure and Tph1 ablation does not influence angiogenic gene markers. **(a)** Heart rate, **(b)** systolic and diastolic blood pressure and **(c)** mean arterial pressure averaged over 24 hours in HFD-fed mice injected with vehicle or LP533401 ( $n = 5$ ). Treatment was preceded by a 3 day baseline period and followed by a 3 day recovery period where no injections were performed. **(d)** *Vegfa* and *Cd31* mRNA expression in iBAT tissue from HFD-fed *Tph1*<sup>+/+</sup> and *Tph1*<sup>-/-</sup> mice ( $n = 6$ .) Data are expressed as means  $\pm$  s.e.m. Data were not significantly different as determined using a Student's *t*-test.

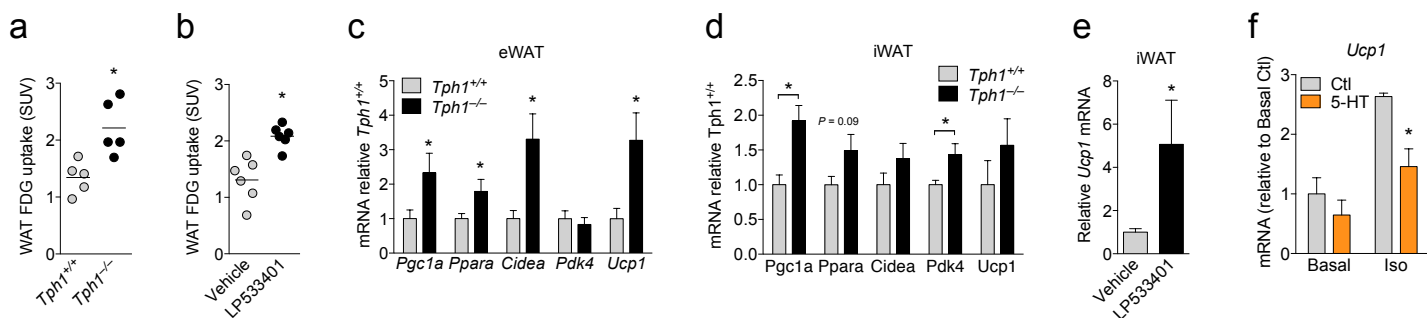

**Supplementary Figure 6.** Beige adipose tissue markers in HFD-fed LP533401 or vehicle treated mice. FDG uptake into WAT of HFD-fed (a) *Tph1*<sup>+/+</sup> and *Tph1*<sup>-/-</sup> mice ( $n = 5$ ) and (b) vehicle and LP533401 treated C57Bl6 mice ( $n = 6$  per treatment). Gene expression of brown adipose markers in (c) eWAT and (d) iWAT depots of HFD-fed *Tph1*<sup>+/+</sup> and *Tph1*<sup>-/-</sup> mice ( $n = 8$  *Tph1*<sup>+/+</sup> and *Tph1*<sup>-/-</sup>). (e) *Ucp1* mRNA expression from HFD-fed mice treated with vehicle or LP533401 ( $n = 8$  for vehicle and LP533401) and in (f) control and isoproterenol-stimulated differentiated inguinal stromal vascular cells ( $n = 4$  per treatment). 5-HT, 5-hydroxytryptamine. Data are expressed as means  $\pm$  s.e.m. \* $P < 0.05$  versus corresponding *Tph1*<sup>+/+</sup>, vehicle or control condition as determined using a Student's *t*-test.

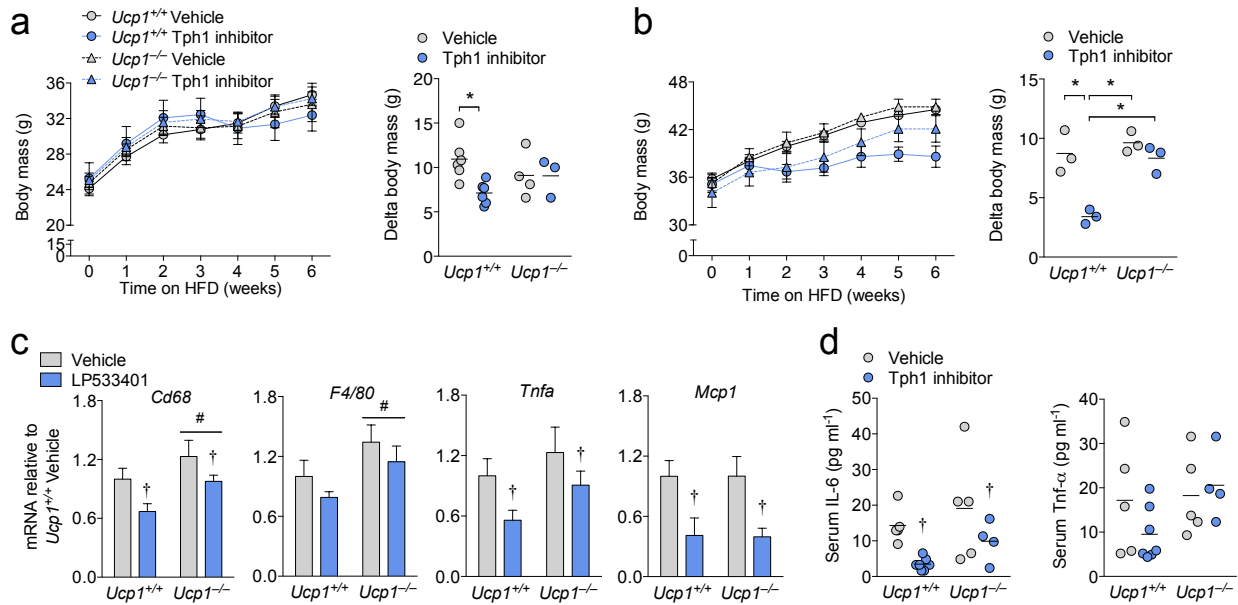

**Supplementary Figure 7.** Body mass over time in HFD-fed *Ucp1*<sup>+/+</sup> and *Ucp1*<sup>-/-</sup> mice treated with a chemical Tph1 inhibitor. Weekly body weights (left) and the increase in body mass after 6 weeks of HFD (right) in (a) cohort 1 and (b) cohort 2 of *Ucp1*<sup>+/+</sup> and *Ucp1*<sup>-/-</sup> mice injected with vehicle or LP533401. Cohort 1:  $n = 6$  for *Ucp1*<sup>+/+</sup> vehicle and LP533401,  $n = 4$  for *Ucp1*<sup>-/-</sup> vehicle and  $n = 3$  for *Ucp1*<sup>-/-</sup> LP533401; cohort 2: ( $n = 3$  for all groups). (c) Inflammatory gene expression in eWAT of *Ucp1*<sup>+/+</sup> and *Ucp1*<sup>-/-</sup> mice injected with vehicle or LP533401 ( $n = 9$  for *Ucp1*<sup>+/+</sup> vehicle and LP533401,  $n = 7$  for *Ucp1*<sup>-/-</sup> vehicle and  $n = 6$  for *Ucp1*<sup>-/-</sup> LP533401). (d) Serum IL-6 and Tnf- $\alpha$  of *Ucp1*<sup>+/+</sup> and *Ucp1*<sup>-/-</sup> mice injected with vehicle or LP533401 ( $n = 5$  for *Ucp1*<sup>+/+</sup> vehicle,  $n = 7$  for *Ucp1*<sup>+/+</sup> LP533401,  $n = 5$  for *Ucp1*<sup>-/-</sup> vehicle and  $n = 4$  for *Ucp1*<sup>-/-</sup> LP533401). Data are expressed as means  $\pm$  s.e.m. \* $P < 0.05$  compared to vehicle, † $P < 0.05$  as a main effect of LP533401 treatment and # $P < 0.05$  relative to *Ucp1*<sup>+/+</sup> as determined using a 2-way ANOVA.
